# Supplementary material for: Comparative Analysis and Determination of the Fatty Acid Composition of Kazakhstan’s Commercial Vegetable Oils by GC-FID
Source: MDPI journal article supplement (doi:10.3390/app13137910), 2023-07-06
Supplement: s1 [file s1]

## Supplementary Materials

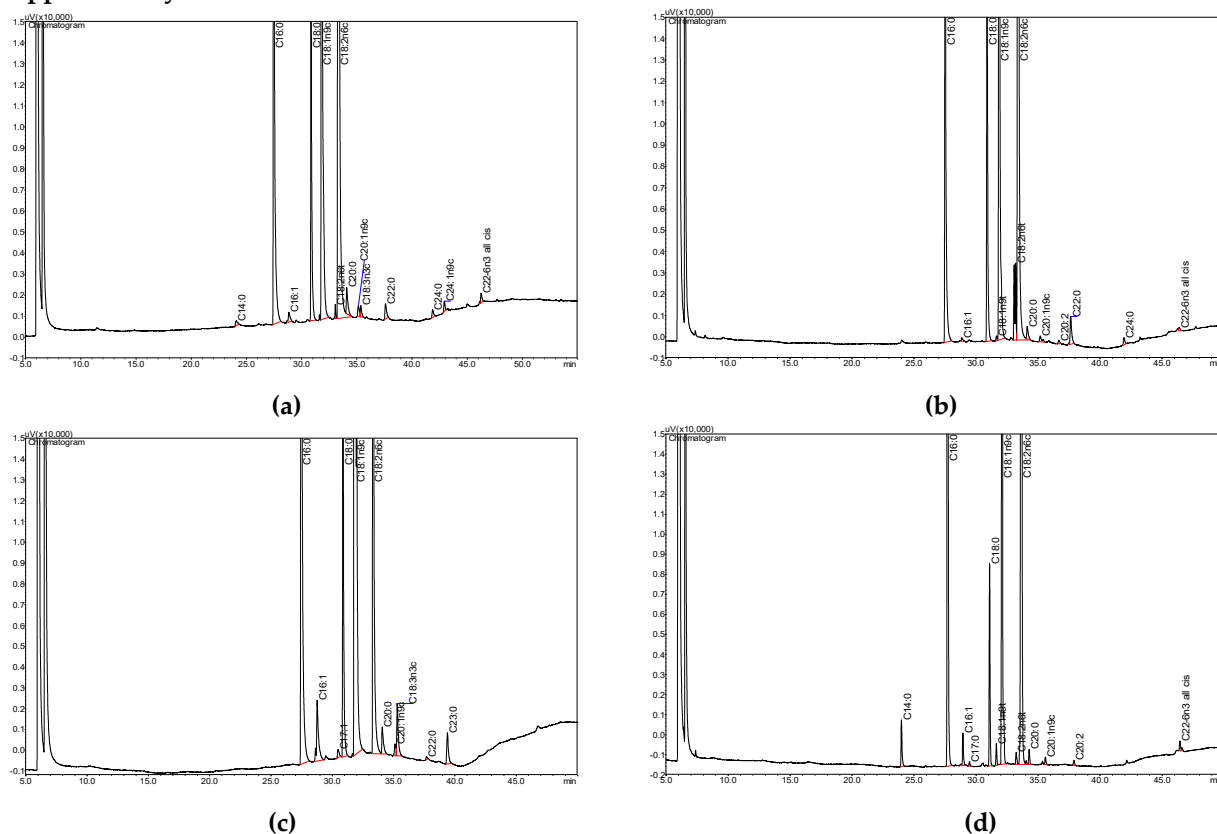

**Figure S1.** GC chromatogram of the separate FA of some of the vegetable oils analyzed: (a) safflower; (b) sunflower; (c) linseed; (d) cottonseed. These were analyzed on a high-polarity capillary column CP-Sil 2560. The column's temperature was programmed as follows: 100°C (5 min), 40°C/min to 210°C (8 min) and 10°C/min to 240°C (16.5 min). All chromatograms are presented with the same scale for both the x- and y-axes.

SFA  
USFA  
MUFA  
PUFA  
omega-6  
omega-3  
PUFA/SFA  
omega-6/omega-3

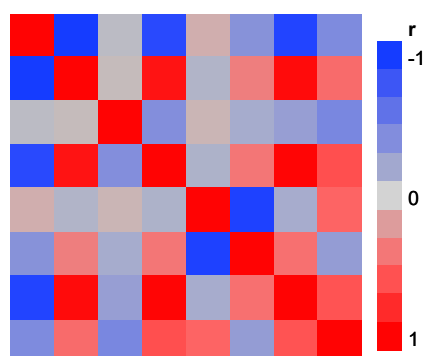

**Figure S2.** Correlations between the main fatty acids ratios. Correlations were performed by identifying the Pearson's correlation coefficient. Red indicates a positive correlation, and blue indicates a negative correlation.

**Table S1.** ANN error functions calculated prediction parameters.

| Oil type   | SSE          | RMSE       | SSE Scaled   | RMSE Scaled | R      |
|------------|--------------|------------|--------------|-------------|--------|
| Safflower  | 43,298785133 | 1,75862741 | 0,1401448936 | 0,10005173  | 0,9918 |
| Sunflower  | 25,163980416 | 1,34068161 | 0,1002972796 | 0,08464096  | 0,9941 |
| Maize      | 10,291662602 | 0,85739067 | 0,0441678814 | 0,05616804  | 0,9974 |
| Linseed    | 0,043363827  | 0,05565444 | 0,0002313123 | 0,00406476  | 0,9999 |
| Cottonseed | 121,03989546 | 2,94035828 | 0,616715174  | 0,2098835   | 0,9637 |
| Soybean    | 7,9760124813 | 0,75479479 | 0,0470736677 | 0,05798625  | 0,9972 |
| Rapeseed   | 0,6911841631 | 0,22219428 | 0,0027505597 | 0,01401672  | 0,9998 |

SSE, sum of squared errors; RMSE, root mean square error; R, regression coefficient;

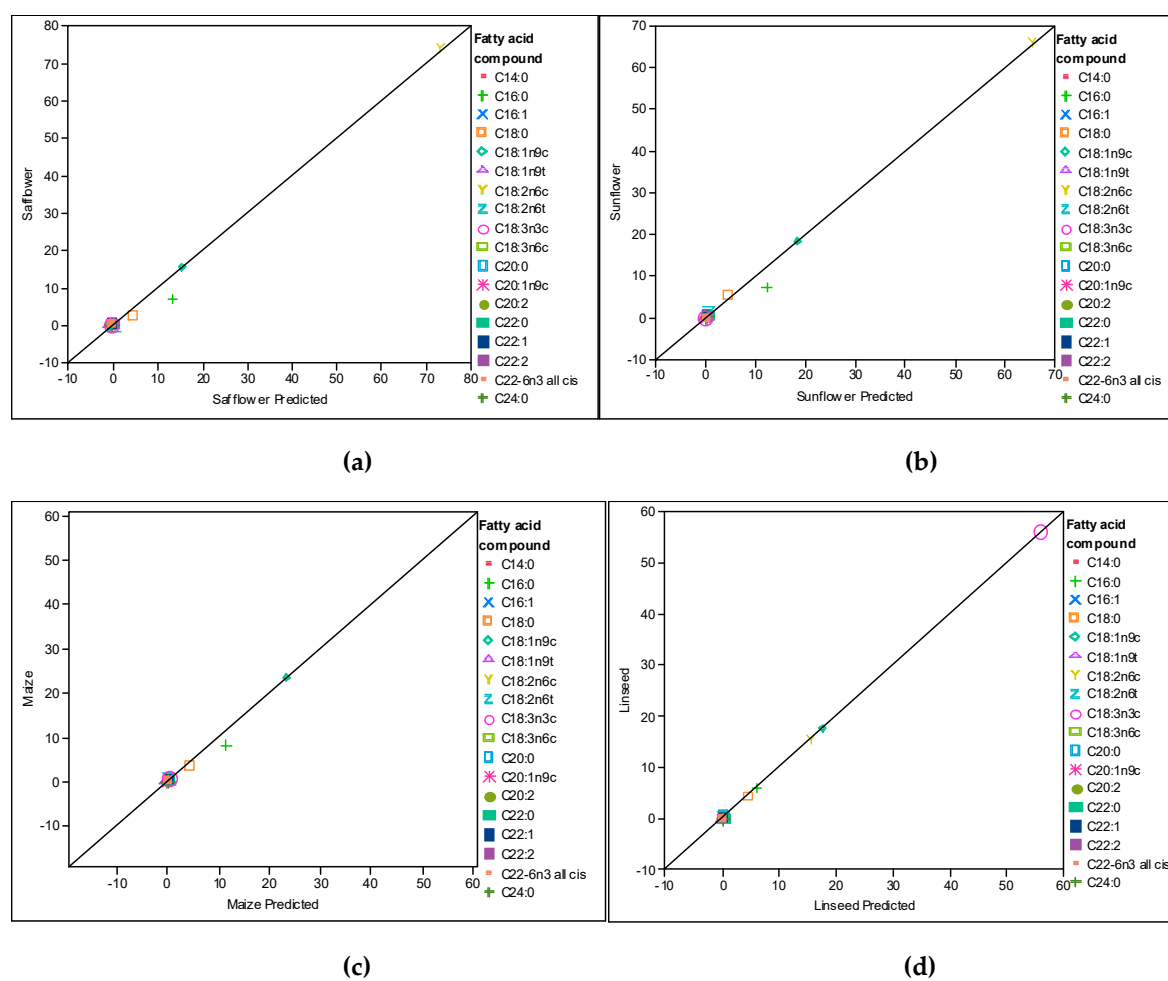

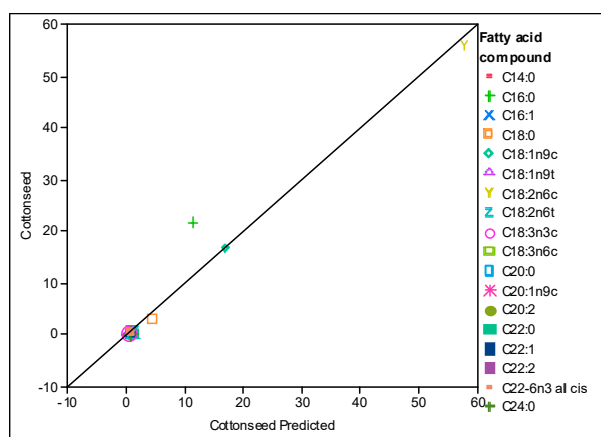

(e)

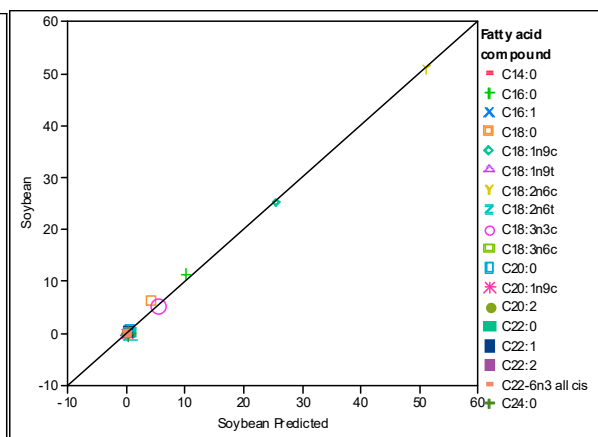

(f)

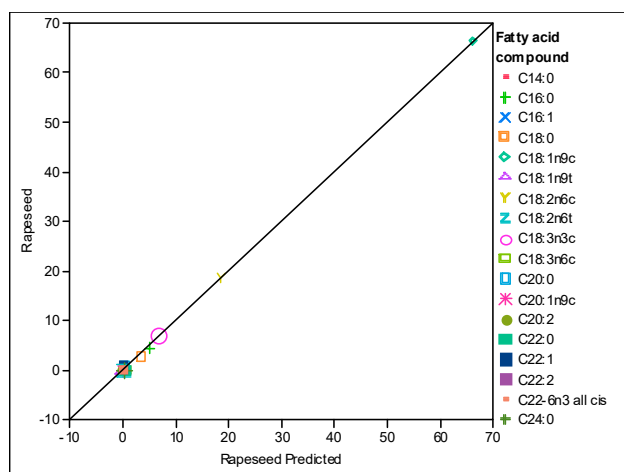

(g)

**Figure S3.** The predictive capability plot for FA composition of vegetable oil, such as (a) safflower; (b) sunflower; (c) maize; (d) linseed; (e) cottonseed; (f) soybean; (g) rapeseed oils.

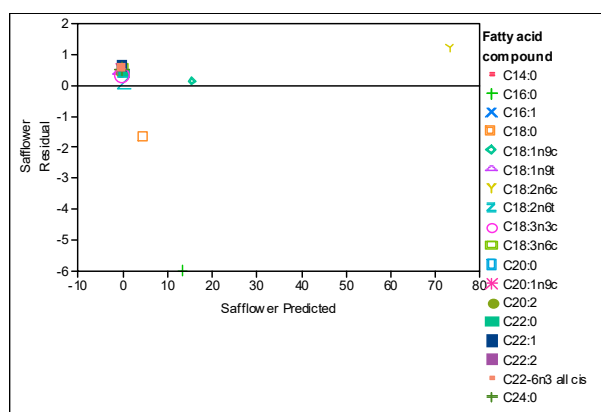

(a)

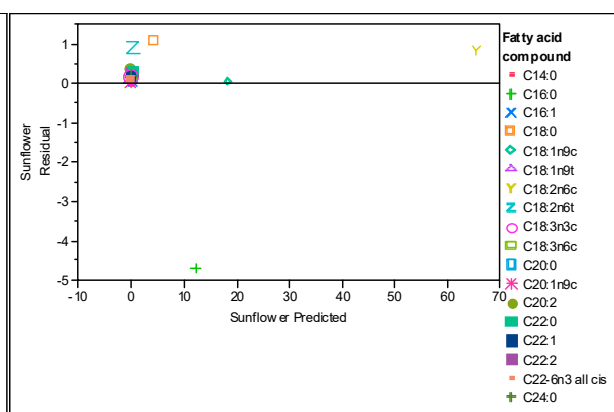

(b)

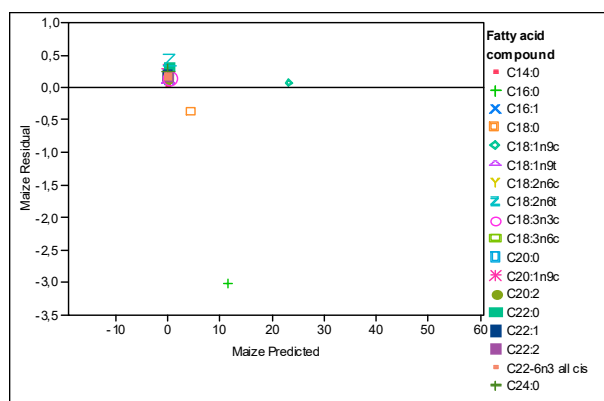

(c)

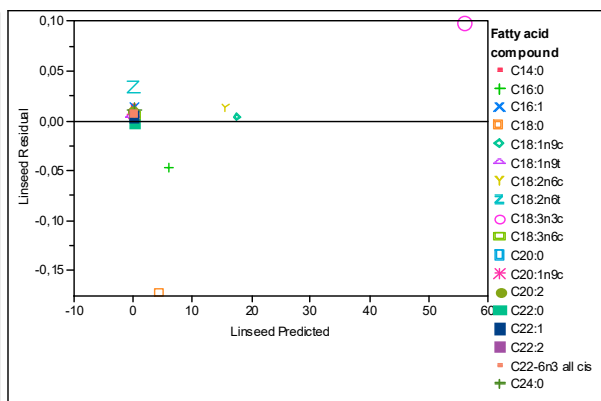

(d)

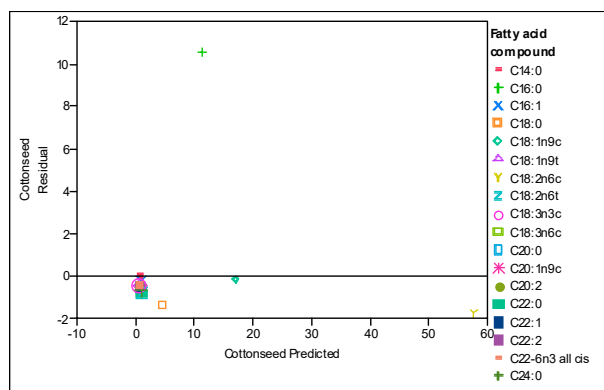

(e)

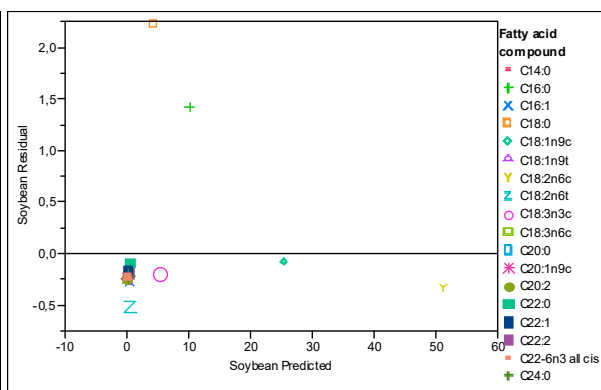

(f)

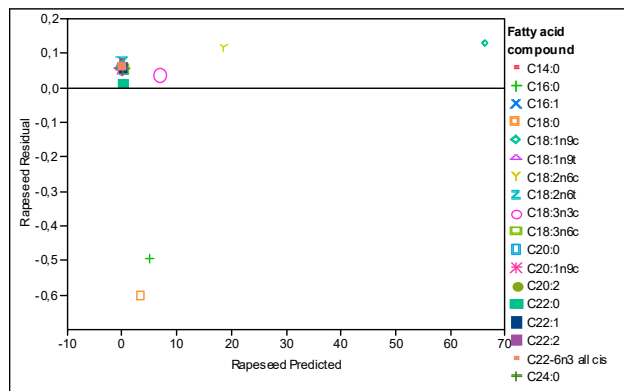

(g)

**Figure S4.** Predictive residual plot for FA composition of vegetable oil, such as (a) safflower; (b) sunflower; (c) maize; (d) linseed; (e) cottonseed; (f) soybean; (g) rapeseed oils.

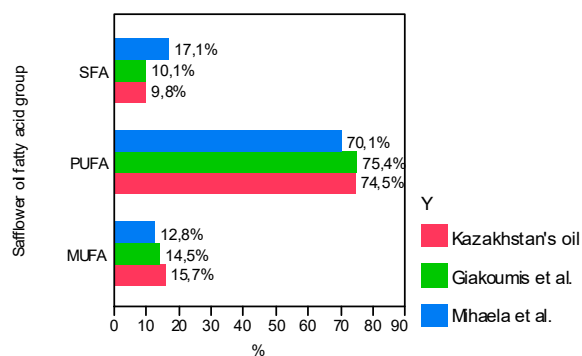

(a)

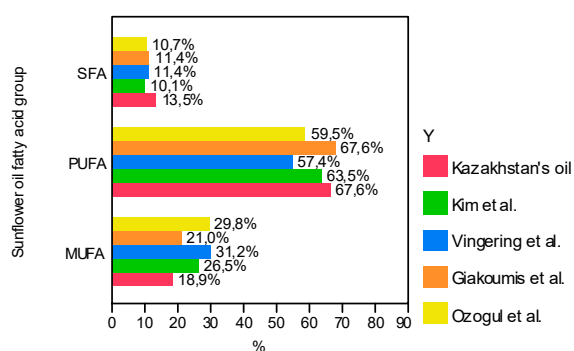

(b)

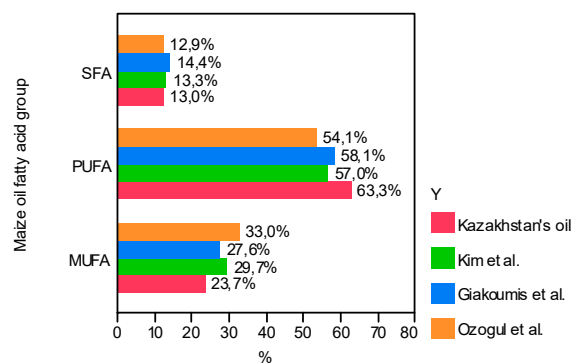

(c)

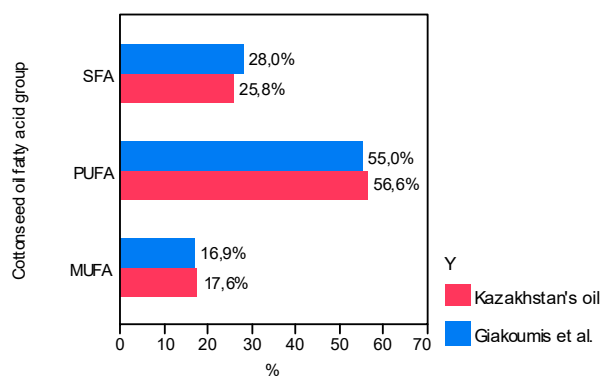

(d)

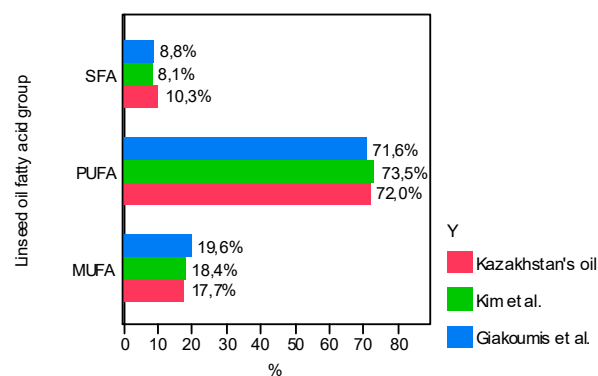

(e)

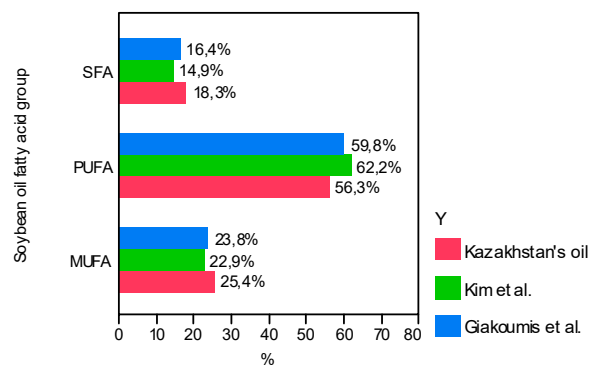

(f)

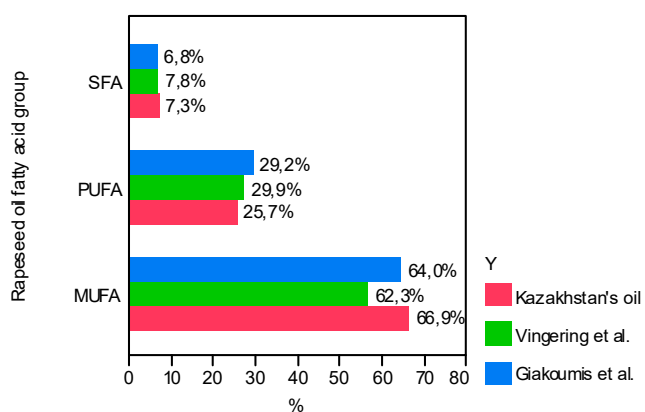

(g)

**Figure S5.** Average values of the SFA, MUFA and PUFA groups (percentage of total FA) in the vegetable oils from different sources, such as (a) safflower; (b) sunflower; (c) maize; (d) linseed; (e) cottonseed; (f) soybean; (g) rapeseed oils.
